# Supplementary material for: Improvement of hydrogen evolution under visible light over Zn1−2x(CuGa)xGa2S4photocatalysts by synthesis utilizing a polymerizable complex method
Source: Royal Society of Chemistry journal article supplement (doi:10.1039/c5ta02114f), 2015-01-01
Supplement: c5ta02114f1.pdf [file c5ta02114f1.pdf]

Electronic Supplementary Information for:

**Improvement of hydrogen evolution under visible light over  
 $\text{Zn}_{1-2x}(\text{CuGa})_x\text{Ga}_2\text{S}_4$  photocatalysts by synthesis utilizing a polymerizable  
complex method**

Ciro Scheremeta Quintans,<sup>a</sup> Hideki Kato,<sup>\*a</sup> Makoto Kobayashi,<sup>a</sup> Hiroshi Kaga,<sup>b</sup>  
Akihide Iwase,<sup>b,c</sup> Akihiko Kudo<sup>b,c</sup> and Masato Kakihana<sup>a</sup>

<sup>a</sup> Institute of Multidisciplinary Research for Advanced Materials, Tohoku University, 2-1-1 Katahira, Aoba-ku, Sendai, Miyagi 980-8577, Japan.

<sup>b</sup> Department of Applied Chemistry, Faculty of Science, Tokyo University of Science, 1-3 Kagurazaka, Shinjuku-ku, Tokyo 162-8601, Japan

<sup>c</sup> Photocatalysis International Research Center, Research Institute for Science and Technology, Tokyo University of Science, Japan

\* E-mail: [hkato@tagen.tohoku.ac.jp](mailto:hkato@tagen.tohoku.ac.jp) (H. Kato)

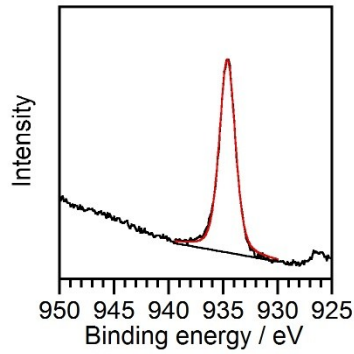

**Fig. S1** XPS of Cu 2p for  $\text{Zn}_{0.4}(\text{CuGa})_{0.3}\text{Ga}_2\text{S}_4$  prepared by sulfurization of an oxide precursor prepared by the PC method.

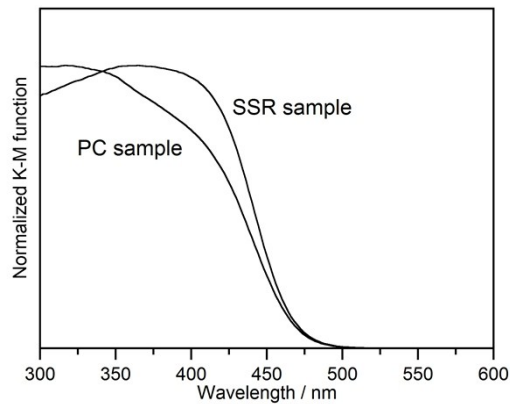

**Fig. S2** UV-vis spectra of  $\text{Zn}_{0.4}(\text{CuGa})_{0.3}\text{Ga}_2\text{S}_4$  synthesized by PC and SSR methods.

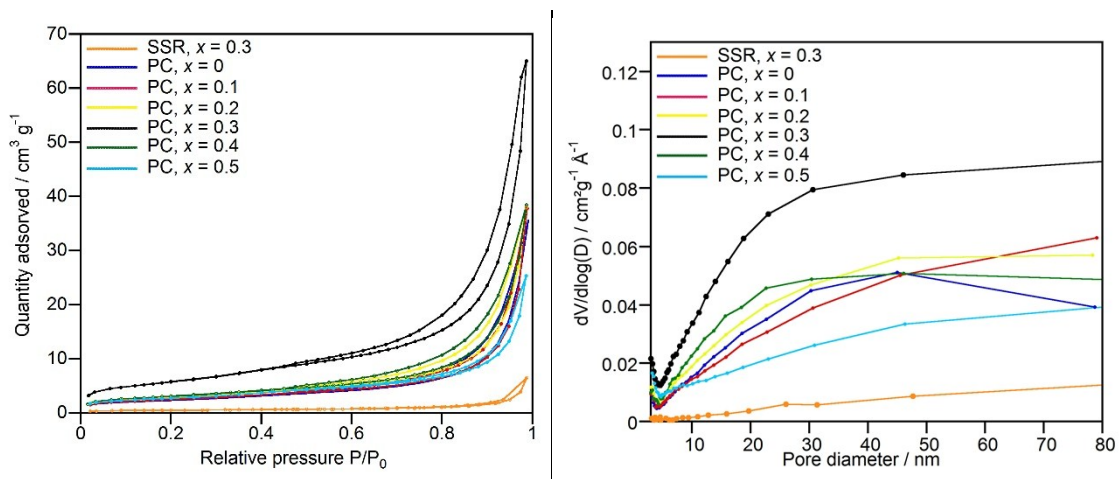

**Fig. S3** (left) Nitrogen adsorption-desorption isotherms and (right) pore size distribution for  $\text{Zn}_{1-2x}(\text{CuGa})_x\text{Ga}_2\text{S}_4$ .
